# Supplementary material for: Chromatin remodeling protein HELLS is critical for retinoblastoma tumor initiation and progression
Source: PubMed Central journal article supplement (PMC7028996; doi:10.1038/s41389-020-0210-7), 2020-02-18

*Chx10-Cre Hells<sup>lox/lox</sup>*

*Hells<sup>lox/lox</sup>*

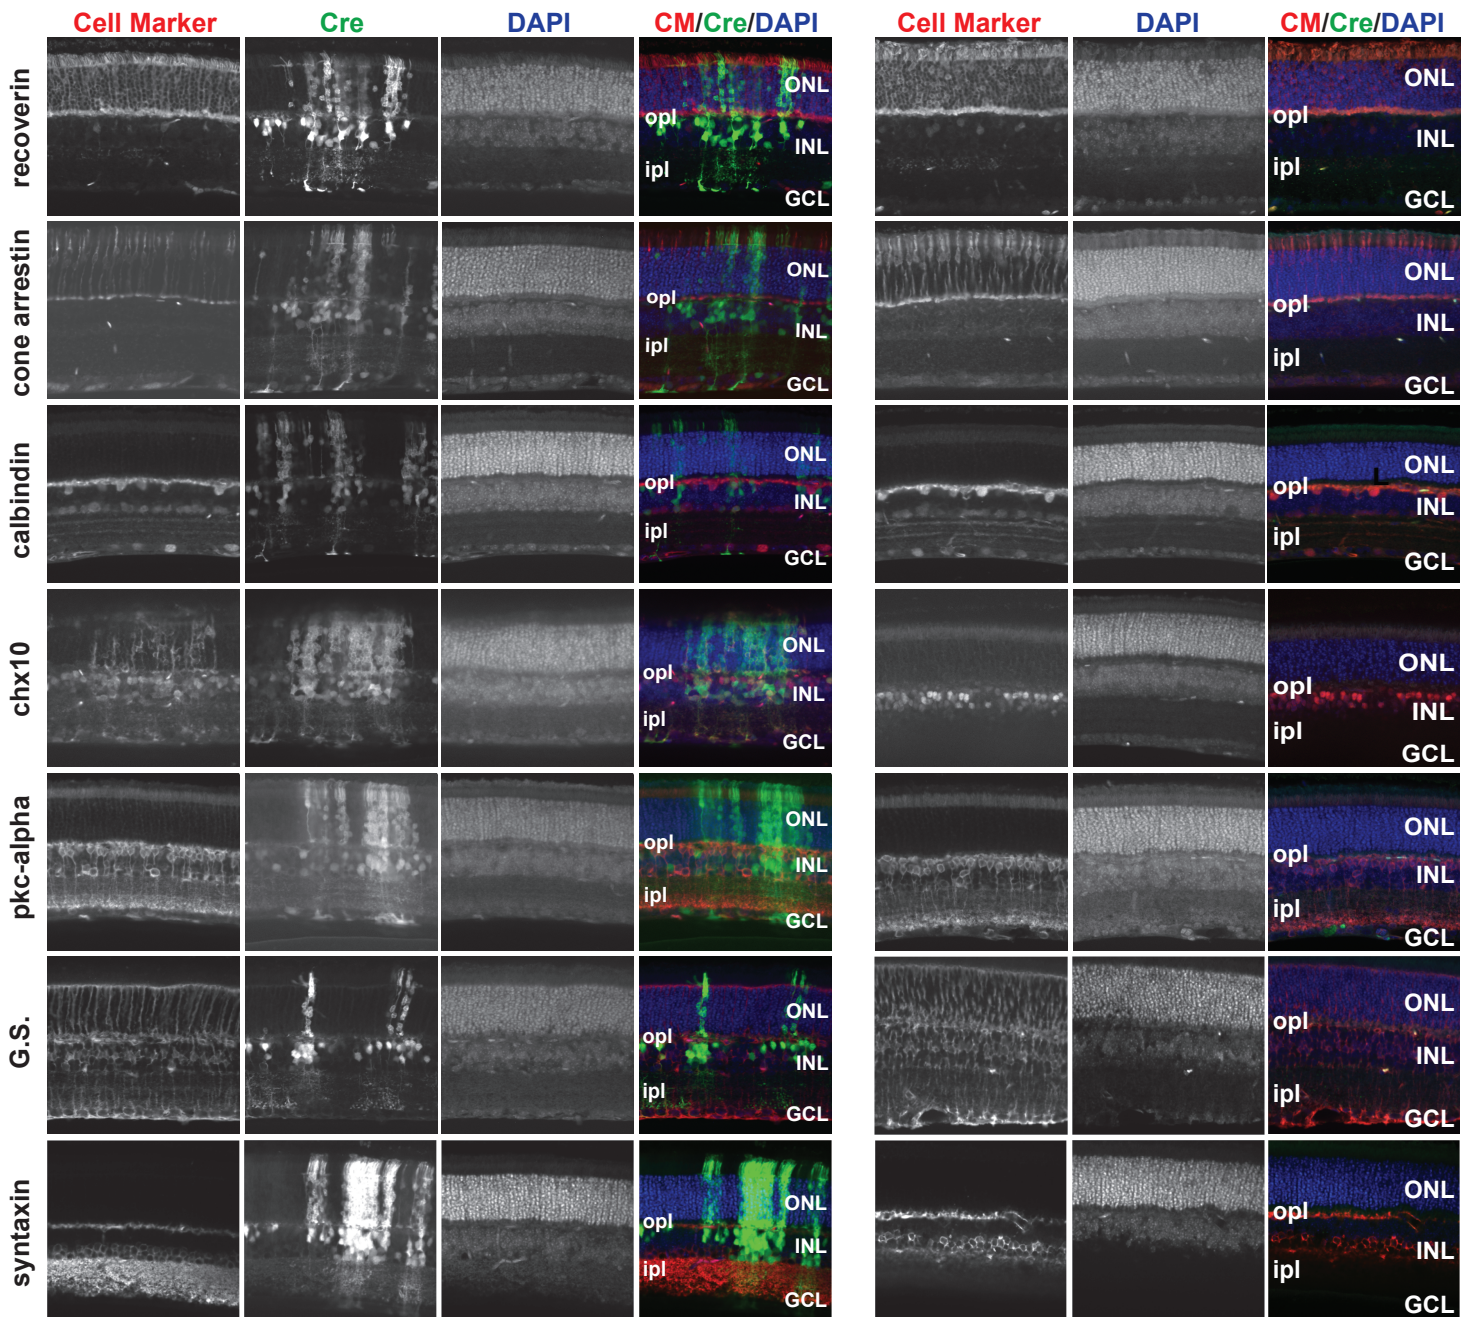

Supplement: 41389_2020_210_MOESM2_ESM.pdf [file 41389_2020_210_MOESM2_ESM.pdf]
