# Supplementary material for: Chromatin remodeling protein HELLS is critical for retinoblastoma tumor initiation and progression
Source: PubMed Central journal article supplement (PMC7028996; doi:10.1038/s41389-020-0210-7), 2020-02-18
Supplement: 41389_2020_210_MOESM8_ESM.pdf [file 41389_2020_210_MOESM8_ESM.pdf]

**Table S1. Real-time PCR primers**

| <b>Gene</b>          | <b>Forward</b>               | <b>Reverse</b>                |
|----------------------|------------------------------|-------------------------------|
| Arr3                 | TGACTTGGATGTGATTGGTCTGA      | GGAGCCACTTGCTTGGTTTG          |
| Calb1                | CACATGTAAGTCTGTTTCGTGTATCCTT | TCACAATAAAGAATCCAGGCAATTAA    |
| Chx10                | TGAGGCAAGGCCCATGTC           | CGGGAGTATGTCCAGGATGTCT        |
| Crx                  | TCTGTGTGTTACAGACATGACCACTAA  | CATCAAGCTTCTTTTGCATTTTGT      |
| GAPDH                | CTCCACTCACGGCAAATTCA         | CGCTCCTGGAAGATGGTGAT          |
| Glutamine Synthetase | GGTGCCAAGTTTGAGTGATGAG       | ACTTTCCCGGTACTGCATCCT         |
| Hells                | CCATTGCCAAGTTTATCAGTGTT      | CTGAAGTCCAAATCCCATGAATT       |
| Hes1                 | AGAGCCTCAGGCCACTGCTA         | TTCGTTTTTAGTGTCCGTCAGAAG      |
| Lhx1                 | GCTACGGGAACCATTTGTCTCA       | GCGAGACCCCGCTACCA             |
| Nr2e3                | AGGCTGGAAGTTGAACAAAAGC       | TCCAGTCTCCCTCCTTTCC           |
| Pax6                 | CACCGCCCTCACCAACAC           | AGGTTGTTTGCCATGGTGAAG         |
| Prkca                | CGCGAGGACAGCCTGTCT           | AGAACCCTTCAAATCAGATTGGT       |
| Prox1                | TTAGAACAGGCTCGTGGTGAGA       | TGAAGCAAAGTAAATAGCAACTAGTGACA |
| Rcvrn                | GCAGCTTCGATGCCAACAG          | TCATGTGCAGAGCAATCACGTA        |
| Rho                  | AGCAGCAGGAGTCAGCCACC         | CCGAAGTTGGAGCCCTGGTG          |
| Atrx                 | TTATGAATAGACGGCTCCAGC        | GCTGGTAGTTAGAAGGAGTCATG       |
| Top2a                | GTGGACTTGGAAGACACGATAG       | GTCAGAGGTTGAGCACTGTATC        |
| human HELLS promoter | CCTGAGAGAGGTCCAGGTAAG        | CTGTCATCTCGGATACCTTAC         |
| mouse Hells promoter | GAACAACCTCGGGACCATCATT       | CTAGCTCCAGCCTTGAATGTC         |
| E2f1                 | GCTGGAGAAACAGTCCCTTTGT       | ACGTACCCTCCCCATCTCAGA         |
| Cdc6                 | TTTCATCTGAGCCCCTCTTTC        | TGCCCTTCCCTCAAAAC             |
| Mcm4                 | AGAGCCTAAGCCCAGTTTTG         | CACAGTAAGGACATAGCCTCTAC       |
| Pcna                 | GGCTCCCAAGATTGAAGATGAG       | GGTGACAGAAAAGACCTCAGG         |
| Ccnb1                | GTAACATAGTCATTCCCTCGGTG      | GTCAGAATTCAAAGCACACCC         |
| MKi67                | GTCATGAGGAAGATCACCAGG        | GCTTTATTGGATAGGACAGAGGG       |
